# Supplementary figures and images for: The lncRNA HOTAIRM1 regulates the degradation of PML-RARA oncoprotein and myeloid cell differentiation by enhancing the autophagy pathway
Source: PubMed Central journal article supplement — Cell Death Differ. 2016 Oct 14;24(2):212–24. doi: 10.1038/cdd.2016.111 (PMC5299705; doi:10.1038/cdd.2016.111), 2016-10-14

# Figure S1

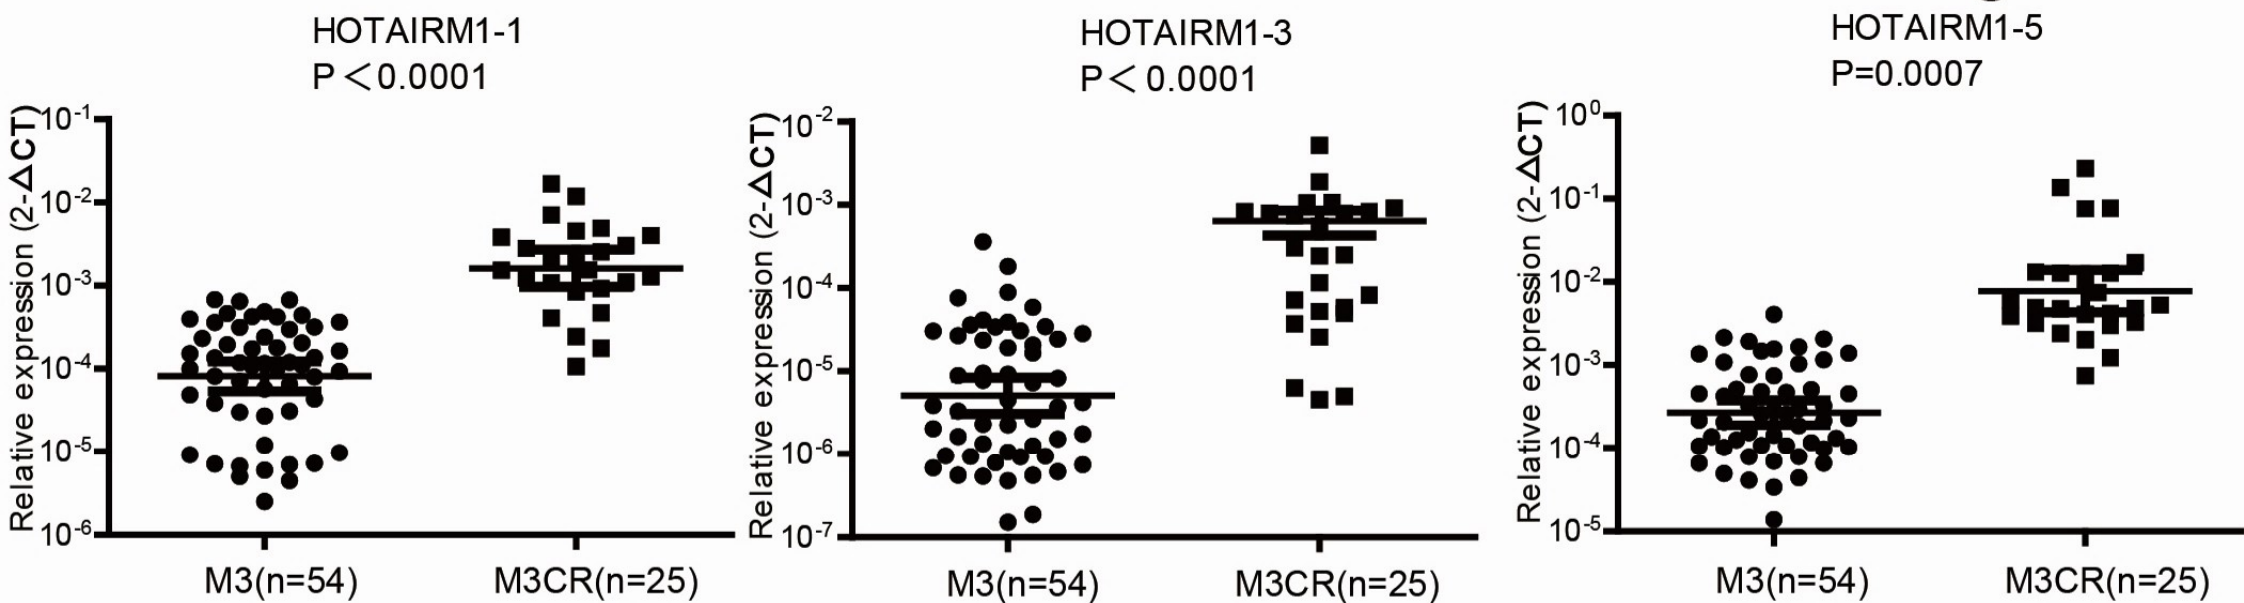

Supplement: cdd2016111x1.pdf [file cdd2016111x1.pdf]

# Figure S2

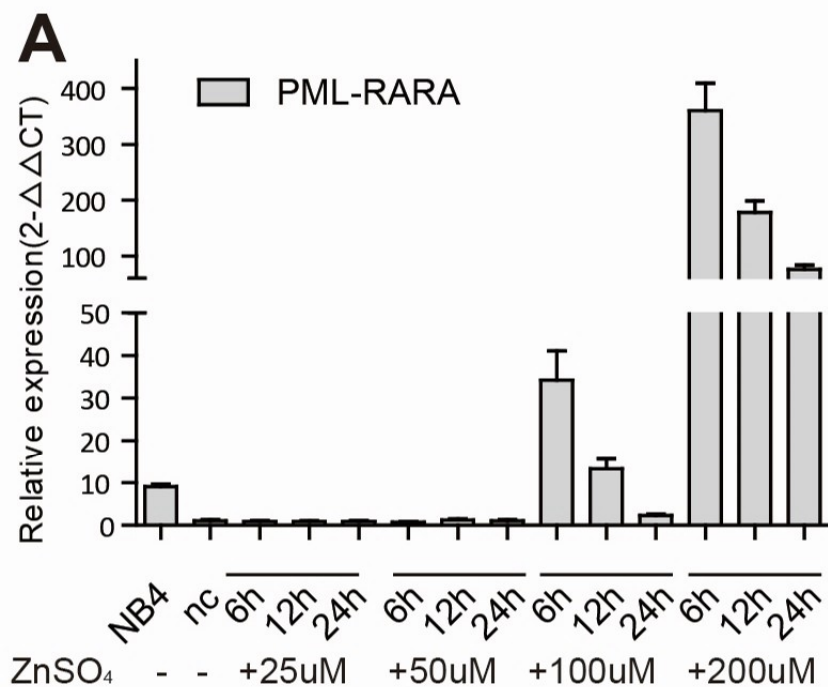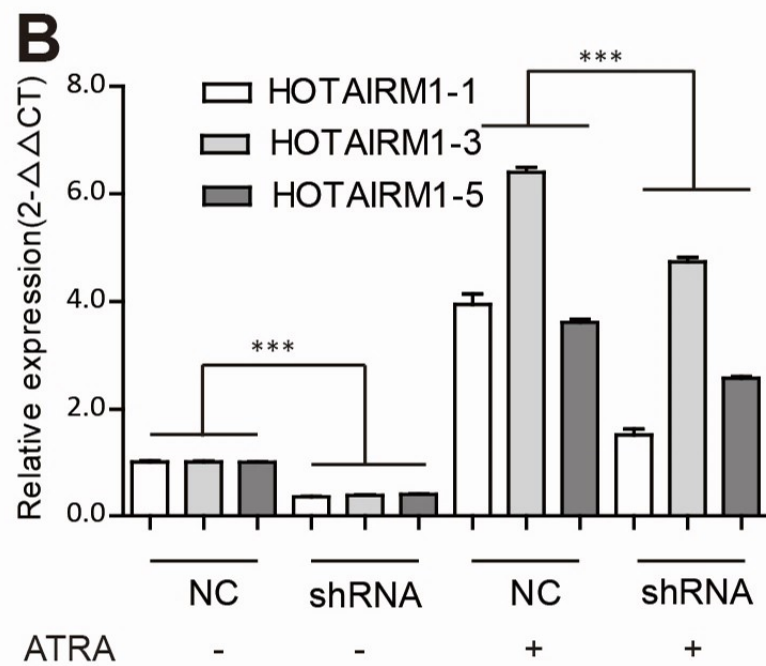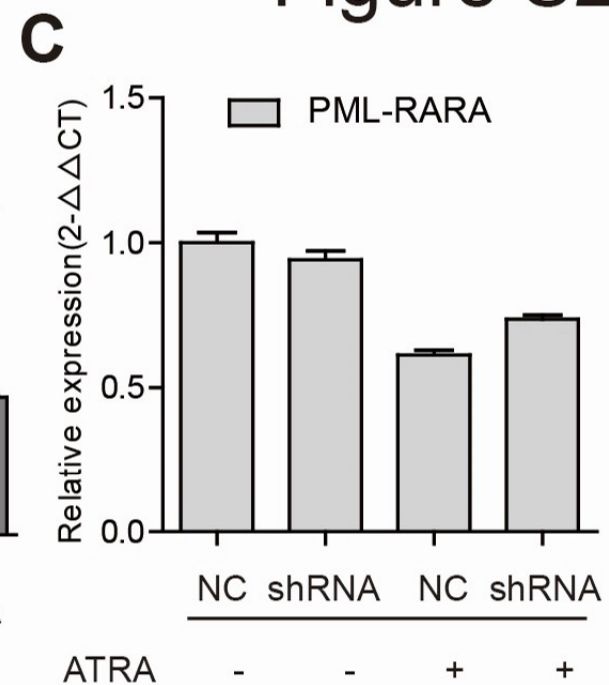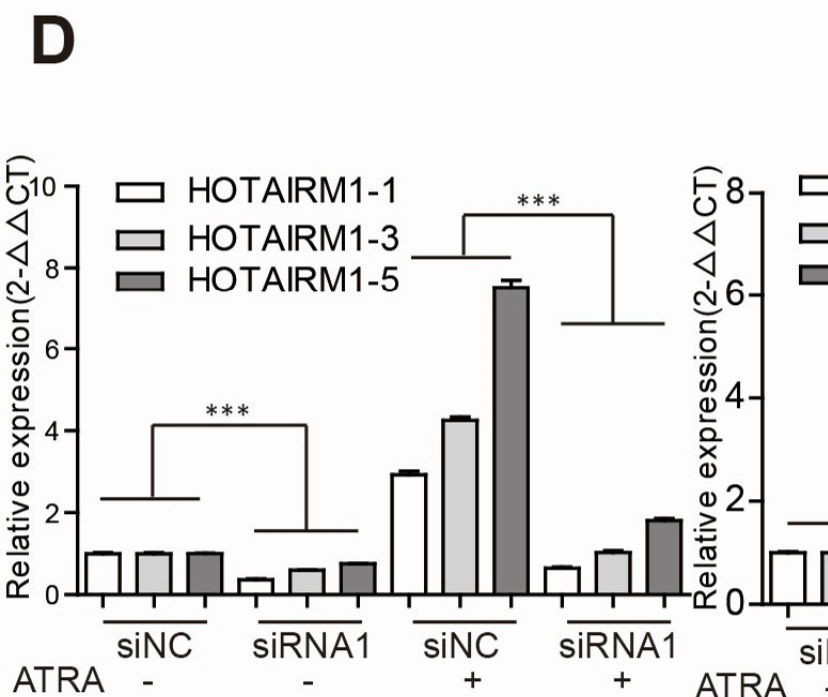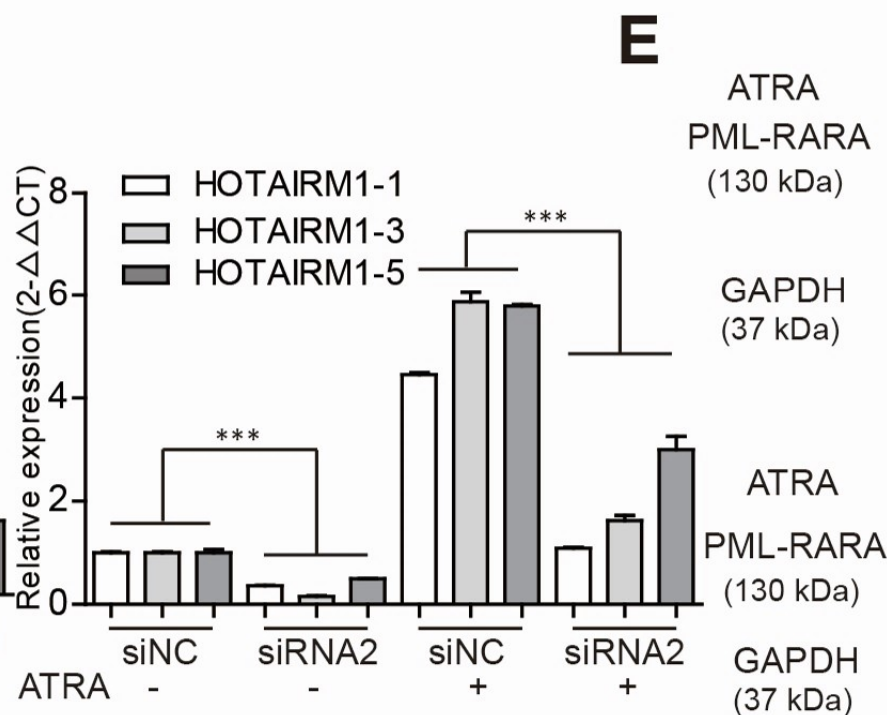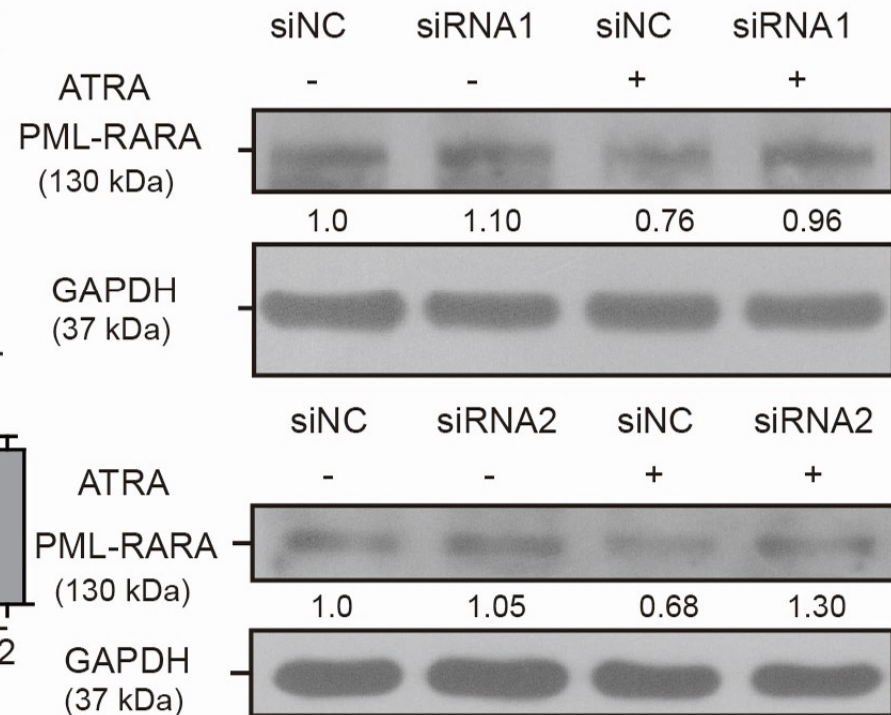

Supplement: cdd2016111x2.pdf [file cdd2016111x2.pdf]

# Figure S3

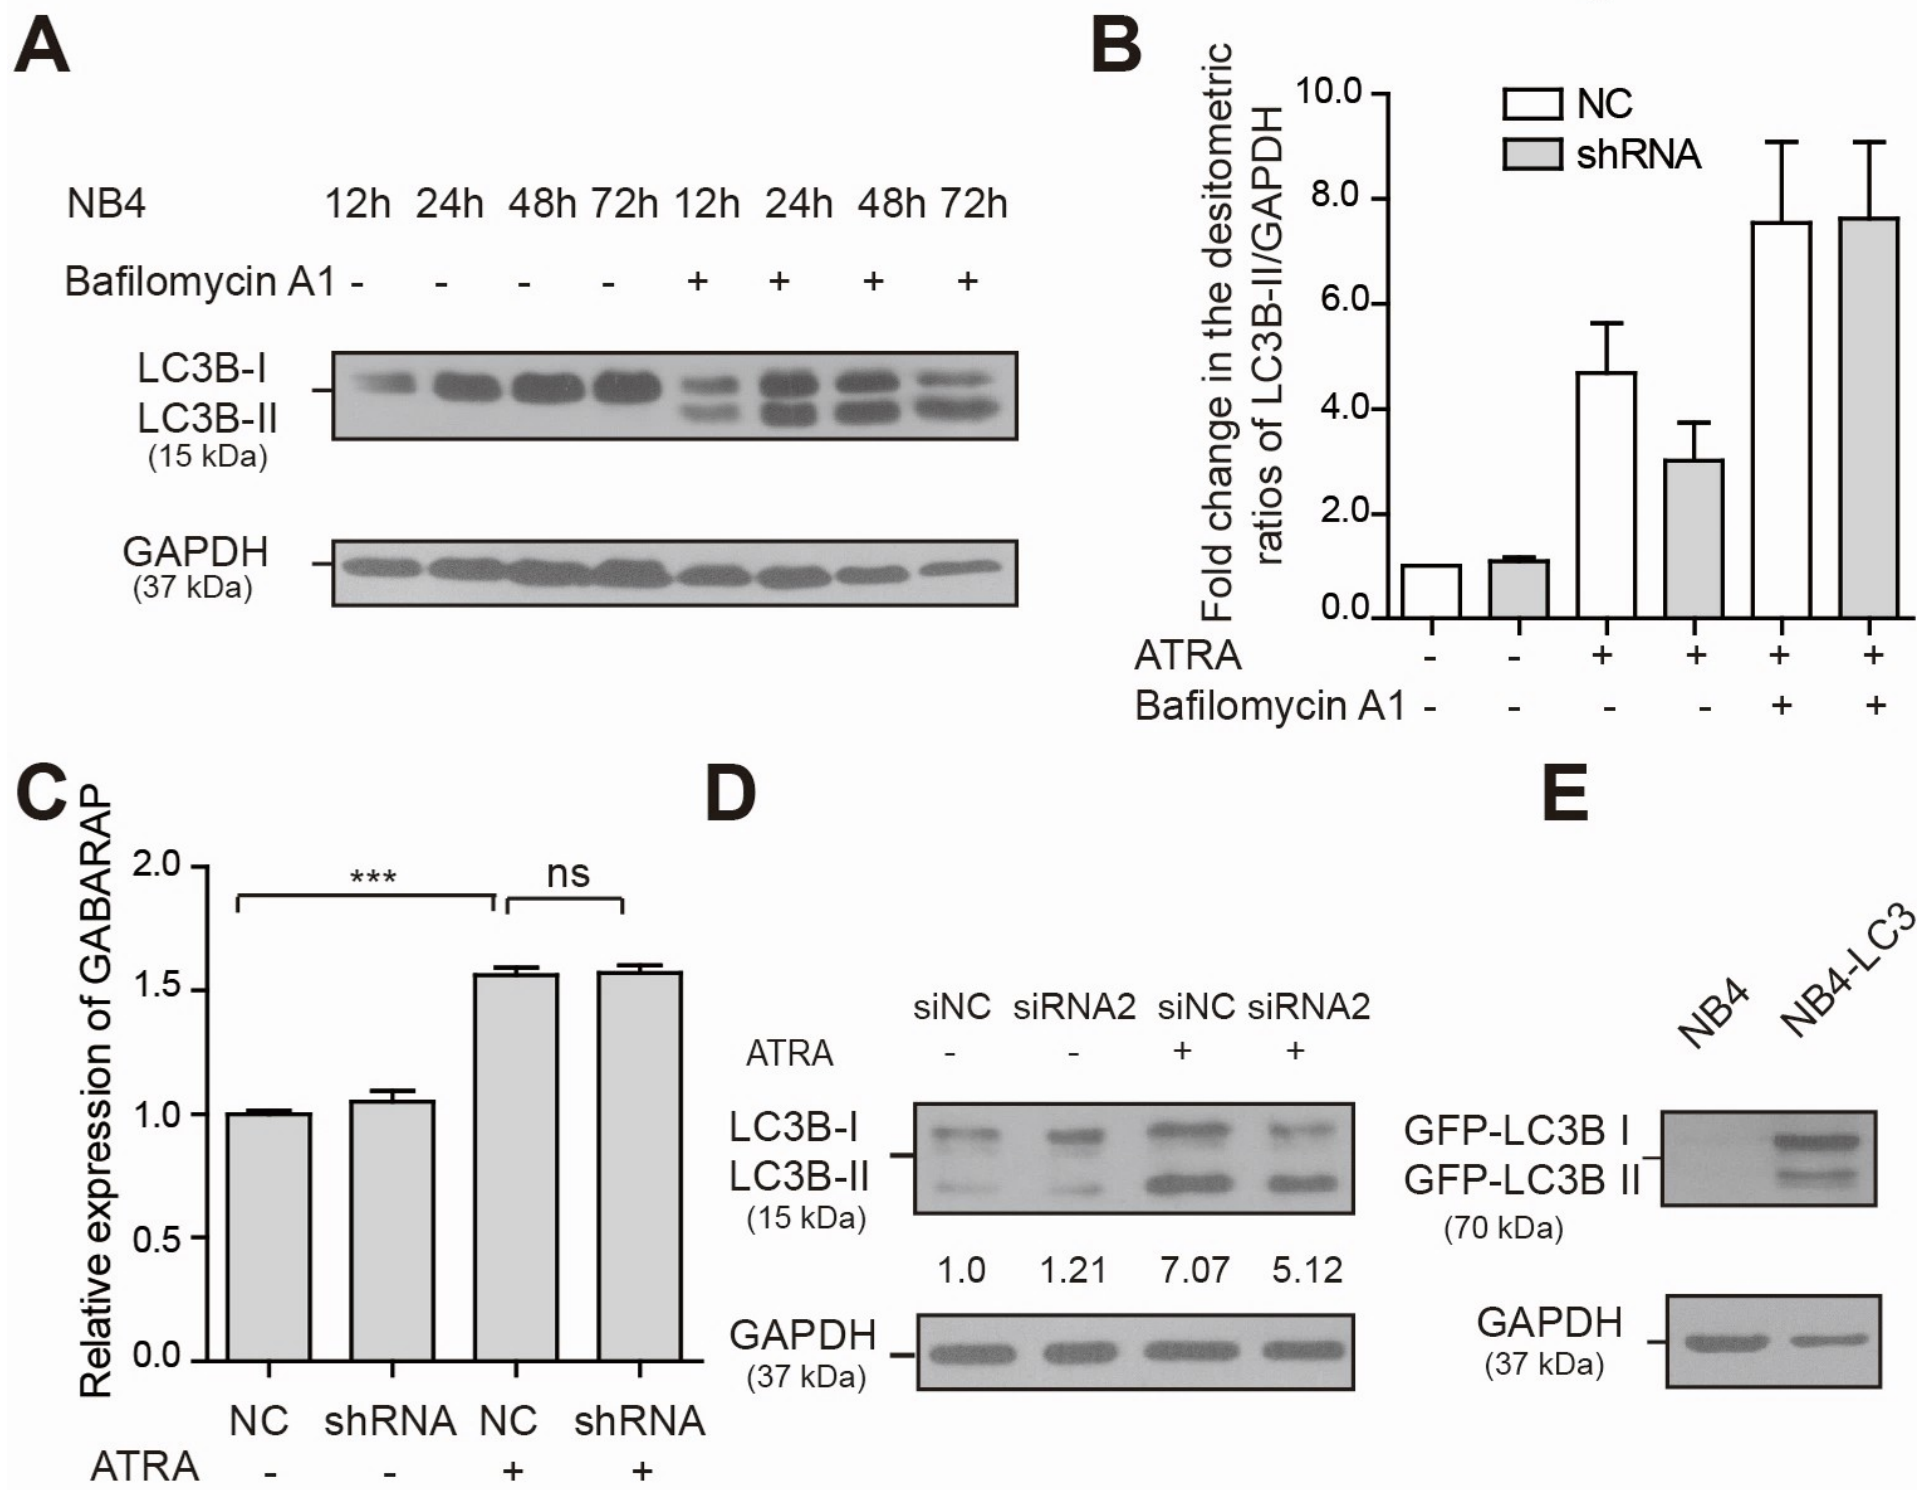

Supplement: cdd2016111x3.pdf [file cdd2016111x3.pdf]

Figure S4

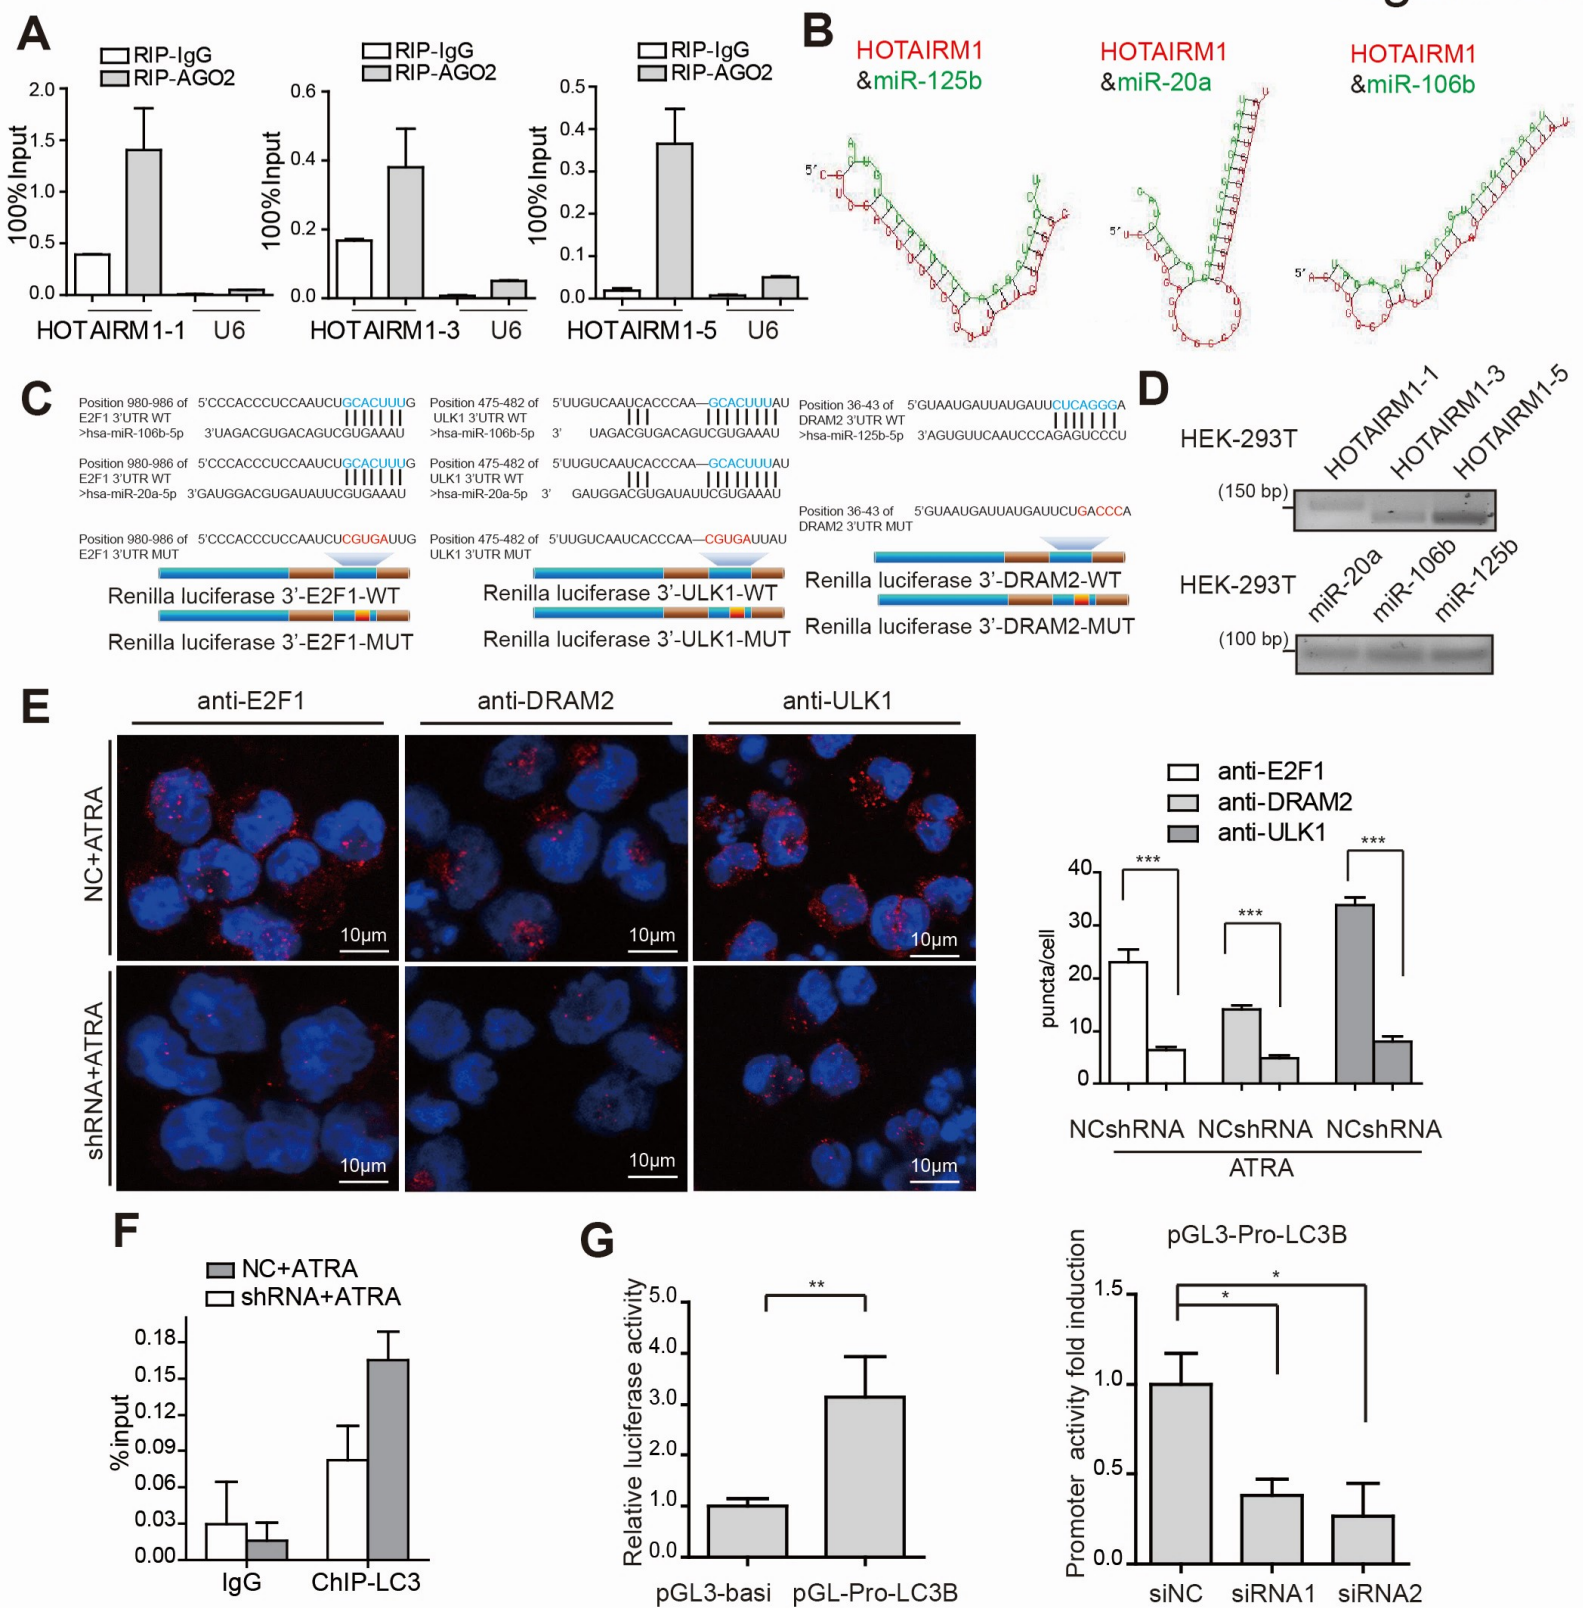

Supplement: cdd2016111x4.pdf [file cdd2016111x4.pdf]
